# Supplementary material for: Genotypic characterization and safety assessment of lactic acid bacteria from indigenous African fermented food products
Source: Springer Nature journal article supplement (doi:10.1186/1471-2180-12-75), 2012-01-01
Supplement: 12866_2011_1716_MOESM1_ESM.pdf [file 12866_2011_1716_MOESM1_ESM.pdf]

100  
90  
80  
70  
60  
50  
40  
30  
20  
10

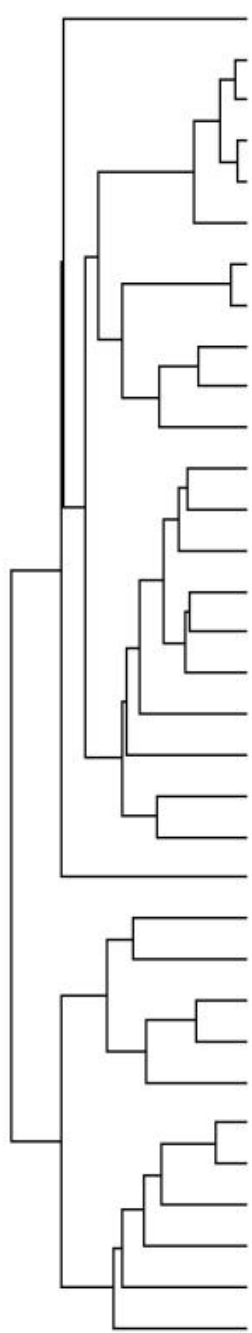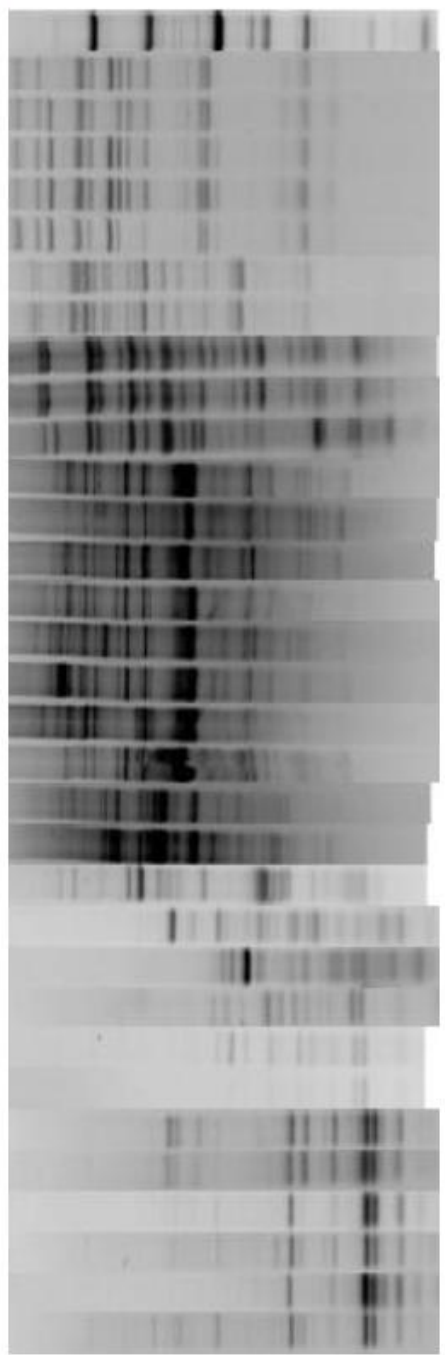

- ZN7b-9 *Lb. delbrueckii* species
- FK10-10
- FK11-2
- FK11-4 *Lb. salivarius*
- FK11-8
- FK11-9
- S1 *Lb. plantarum*
- S2
- P4
- P5 *Ped. pentosaceus*
- S4
- L415
- L106
- LA113
- L547 *Lb. plantarum*
- L260
- L142
- L263
- L544
- ZN7b-2 *Lb. fermentum*
- ZN7b-7
- L8 *Leuc. pseudomesenteroides*
- L499 *Lb. ghanensis*
- L489
- N10 *Ped. acidilactici*
- N8
- N9
- FK10-9
- SK9-2
- P3 *W. confusa*
- SK9-7
- SK9-5
- P2
