# Supplementary material for: Genotypic characterization and safety assessment of lactic acid bacteria from indigenous African fermented food products
Source: Springer Nature journal article supplement (doi:10.1186/1471-2180-12-75), 2012-01-01

S 1 2 3 4 5 6 7 8 9 10 11 12 13 14 15 16 S

bp

bp

318

← 1000

218

← 500

107

← 250

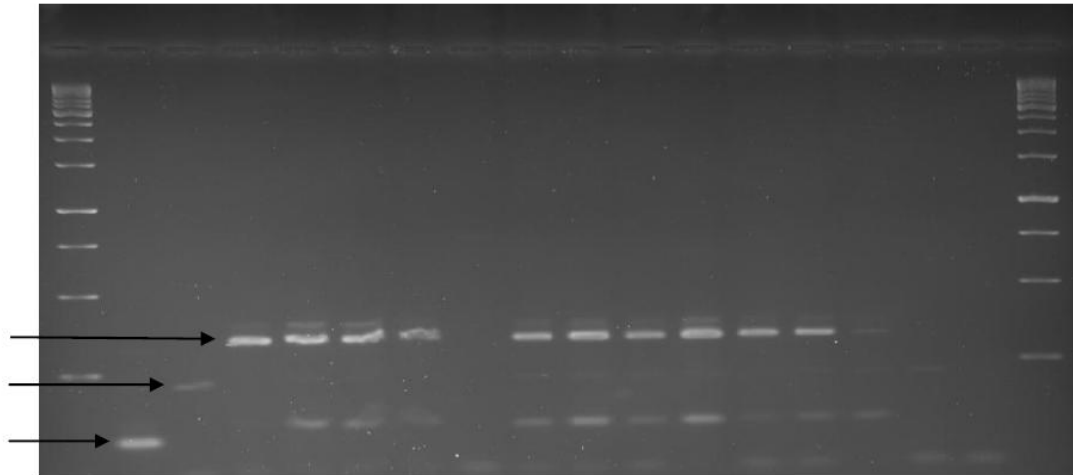

Supplement: 12866_2011_1716_MOESM2_ESM.pdf [file 12866_2011_1716_MOESM2_ESM.pdf]
