# Supplementary material for: Genotypic characterization and safety assessment of lactic acid bacteria from indigenous African fermented food products
Source: Springer Nature journal article supplement (doi:10.1186/1471-2180-12-75), 2012-01-01

SK9-7

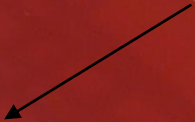

TSA SB TSA + SB  
Lot/Ox B: 991279 11-01  
Exp: 01/2011/03/04

FK11-4

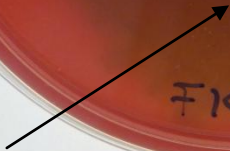

Supplement: 12866_2011_1716_MOESM4_ESM.pdf [file 12866_2011_1716_MOESM4_ESM.pdf]
